# Supplementary material for: Optimized Removal of Azo Dyes from Simulated Wastewater through Advanced Plasma Technique with Novel Reactor
Source: MDPI journal article supplement (doi:10.3390/w14193152), 2022-10-06
Supplement: s1 [file s1]

# Optimized removal of azo dyes from simulated wastewater through advanced plasma technique with novel reactor

Yang Liu<sup>1,\*</sup>, Jia-Wei Song<sup>1</sup>, Jia Bao<sup>1,\*</sup>, Xin-Jun Shen<sup>1</sup>, Cheng-Long Li<sup>1</sup>, Xin Wang<sup>1</sup>, and Li-Xin Shao<sup>2</sup>

<sup>1</sup> School of Environmental and Chemical Engineering, Shenyang University of Technology, Shenyang 110870, China; liuyangl@sut.edu.cn; baojia@sut.edu.cn

<sup>2</sup> School of Mechanical Engineering, Shenyang University of Technology, Shenyang 110870, China

\* Correspondence: liuyang@sut.edu.cn (Y. Liu); baojia@sut.edu.cn (J. Bao)

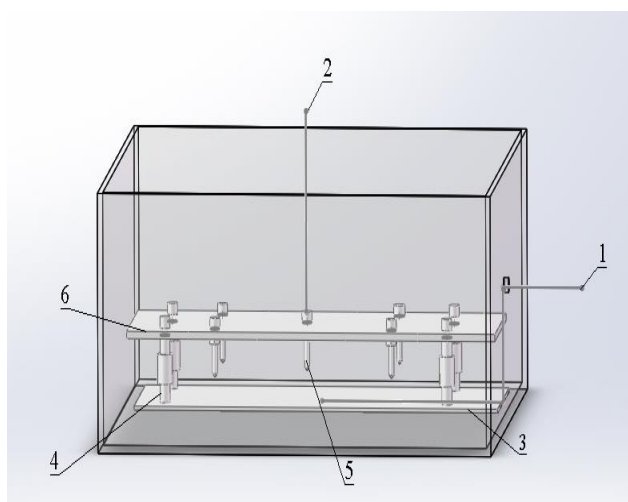

**Figure S1.** The sketch map of conventional plasma reactor

(1. Ground lead 2. Power lead 3. Grounded electrode plate 4. Nylon column 5. Discharge needle 6. Discharge electrode plate).
